# Supplementary material for: The targeting mechanism of DHA ligand and its conjugate with Gemcitabine for the enhanced tumor therapy
Source: PubMed Central journal article supplement (PMC4116508; doi:10.18632/oncotarget.1969), 2014-05-13
Supplement: oncotarget-05-3622-s001.pdf [file oncotarget-05-3622-s001.pdf]

## The targeting mechanism of DHA ligand and its conjugate with Gemcitabine for the enhanced tumor therapy

### Supplementary Material

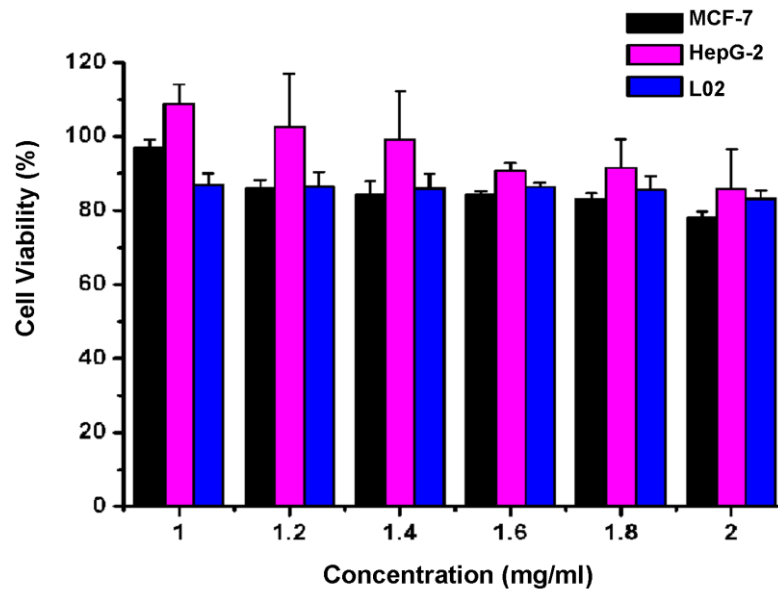

**Supplementary Figure 1:** Cytotoxicity of DHA-Cypate probe. Cell viability of MCF-7 cells, HepG-2 cells and L02 cells incubated with different concentration DHA-Cypate probe. Data are given as mean  $\pm$  SD (n=5)

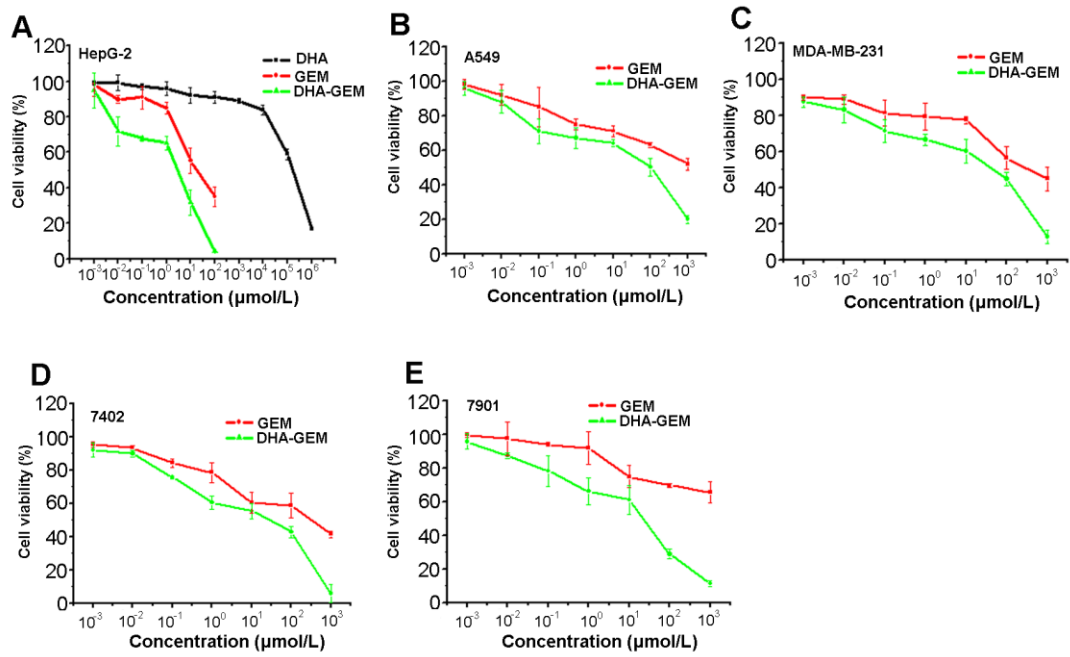

**Supplementary Figure 2:** *In vitro* antitumor efficacy of DHA-GEM on (A) HepG-2 cells incubated with DHA, free gemcitabine and DHA-GEM.(B)A549,(C)MDA-MB-231, (D) 7402, (E) 7901 incubated with free gemcitabine and DHA-GEM. Data are given as mean  $\pm$  SD (n=5)
